# Supplementary material
Source: publisher figshare collection journal article supplement (https://diabetesjournals.figshare.com/articles/dataset/_/16712971)
Supplement: Supplementary file 1 [file 2]

## SUPPLEMENTARY ONLINE REPOSITORY

**SUPPLEMENTARY FIGURE 1. Blood Tfh and Tfr cells in human T1D.** (A) The non-parametric (Spearman) two-tailed test was used for correlation analyses between percentage of Tfh, Tfr, CXCR5<sup>+</sup> Treg cells and years with T1D in living subjects with symptomatic T1D. (B) Percentage of Tfr (CXCR5<sup>+</sup>FOXP3<sup>+</sup>), CXCR5<sup>+</sup>Treg (CXCR5<sup>+</sup>FOXP3<sup>+</sup>), and Tfh (CXCR5<sup>+</sup>FOXP3<sup>-</sup>) cells in single AAb<sup>+</sup> ( $n = 7$ ), stage 1 ( $n = 6$ ) and stage 2 ( $n = 9$ ). (C) Graph shows Tfr (CXCR5<sup>+</sup>FOXP3<sup>+</sup>), cells in other (non-DR3 or DR4 HLA) ( $n = 6$ ), DR3/DRX ( $n = 9$ ), DR4/DRX ( $n = 4$ ) and DR3/DR4 ( $n = 4$ ). (D) The non-parametric (Spearman) two-tailed test was used for correlation analyses between percentage of Tfh, Tfr, CXCR5<sup>+</sup> Treg cells and Tfh/Tfr ratio with plasma CXCL13 concentration.

**SUPPLEMENTARY FIGURE 2. Distribution of Tfh subsets in patients with pre-symptomatic and symptomatic T1D.** (A) Representative flow cytometry plots (B) and graph for Tfh2 (CXCR3<sup>+</sup>CCR6<sup>-</sup>), Tfh17 (CXCR3<sup>+</sup>CCR6<sup>+</sup>), Tfh1/17 (CXCR3<sup>+</sup>CCR6<sup>+</sup>) and Tfh1 (CXCR3<sup>+</sup>CCR6<sup>-</sup>), gated on singlets, lymphocytes, CD3<sup>+</sup>CD19<sup>-</sup> and CD4<sup>+</sup>, CD4<sup>+</sup>CXCR5<sup>+</sup> cells. (C) Representative flow cytometry plots for CXCR3<sup>+</sup>PD-1<sup>+</sup> Tfh cells, gated on singlets, lymphocytes, CD3<sup>+</sup>CD4<sup>+</sup>, CD4<sup>+</sup>CXCR5<sup>+</sup> cells. (D) Percentage of CXCR3<sup>+</sup> PD-1<sup>+</sup> Tfh cells from patients with presymptomatic and symptomatic T1D. Tfh cell subsets in AAb<sup>-</sup> ( $n = 14$ ), AAb<sup>+</sup> ( $n = 23$ ) and T1D ( $n = 31$ ). In all graphs, each point represents an individual donor with the median indicated by a black line. Asterisks indicate statistical significance as calculated by Kruskal-Wallis. \* $p < 0.05$  \*\* $p < 0.005$

**SUPPLEMENTARY FIGURE 3. Expression of CD25 and functional properties of tissue-resident CXCR5<sup>+</sup>FOXP3<sup>+</sup> Tfr cells.** (A) gating strategy for sorting Tfh (CXCR5<sup>+</sup>CD25<sup>-</sup>), Tfr (CXCR5<sup>+</sup>CD25<sup>+</sup>), Tconv (CXCR5<sup>+</sup>CD25<sup>-</sup>) and Treg (CXCR5<sup>+</sup>CD25<sup>+</sup>) cells sorted from spleen of BDC2.5 mice. (B) Representative gating and (C) frequencies of Tfh (CXCR5<sup>+</sup>FOXP3<sup>-</sup>), Tfr (CXCR5<sup>+</sup>FOXP3<sup>+</sup>) and CXCR5<sup>+</sup>Treg cells (CXCR5<sup>+</sup>FOXP3<sup>+</sup>) from spleen and BDC2.5 mice ( $n = 4$ ). (D) Representative gating and (E) frequencies of Tfh, Tfr and CXCR5<sup>+</sup> Treg cells from peripheral blood of adoptively transferred mice at day 12 post injection. In all graphs, points

represent individual mice. Asterisks indicate statistical significance as calculated by paired-t test.  
\*\*p< 0.01.
